# Supplementary material
Source: PubMed Central journal article supplement (PMC9301595)

## Supplemental Online Content

Kim EJ, Mangold AR, DeSimone JA, et al. Efficacy and safety of topical hypericin photodynamic therapy for early-stage cutaneous T-cell lymphoma (mycosis fungoides): the FLASH phase 3 randomized clinical trial. *JAMA Dermatol*. Published online July 20, 2022. doi:10.1001/jamadermatol.2022.2749

**eFigure 1.** CONSORT Diagram

**eFigure 2.** Visible-Light Skin Penetration

This supplemental material has been provided by the authors to give readers additional information about their work.

## eFigure 1) FLASH STUDY: CONSORT Diagram

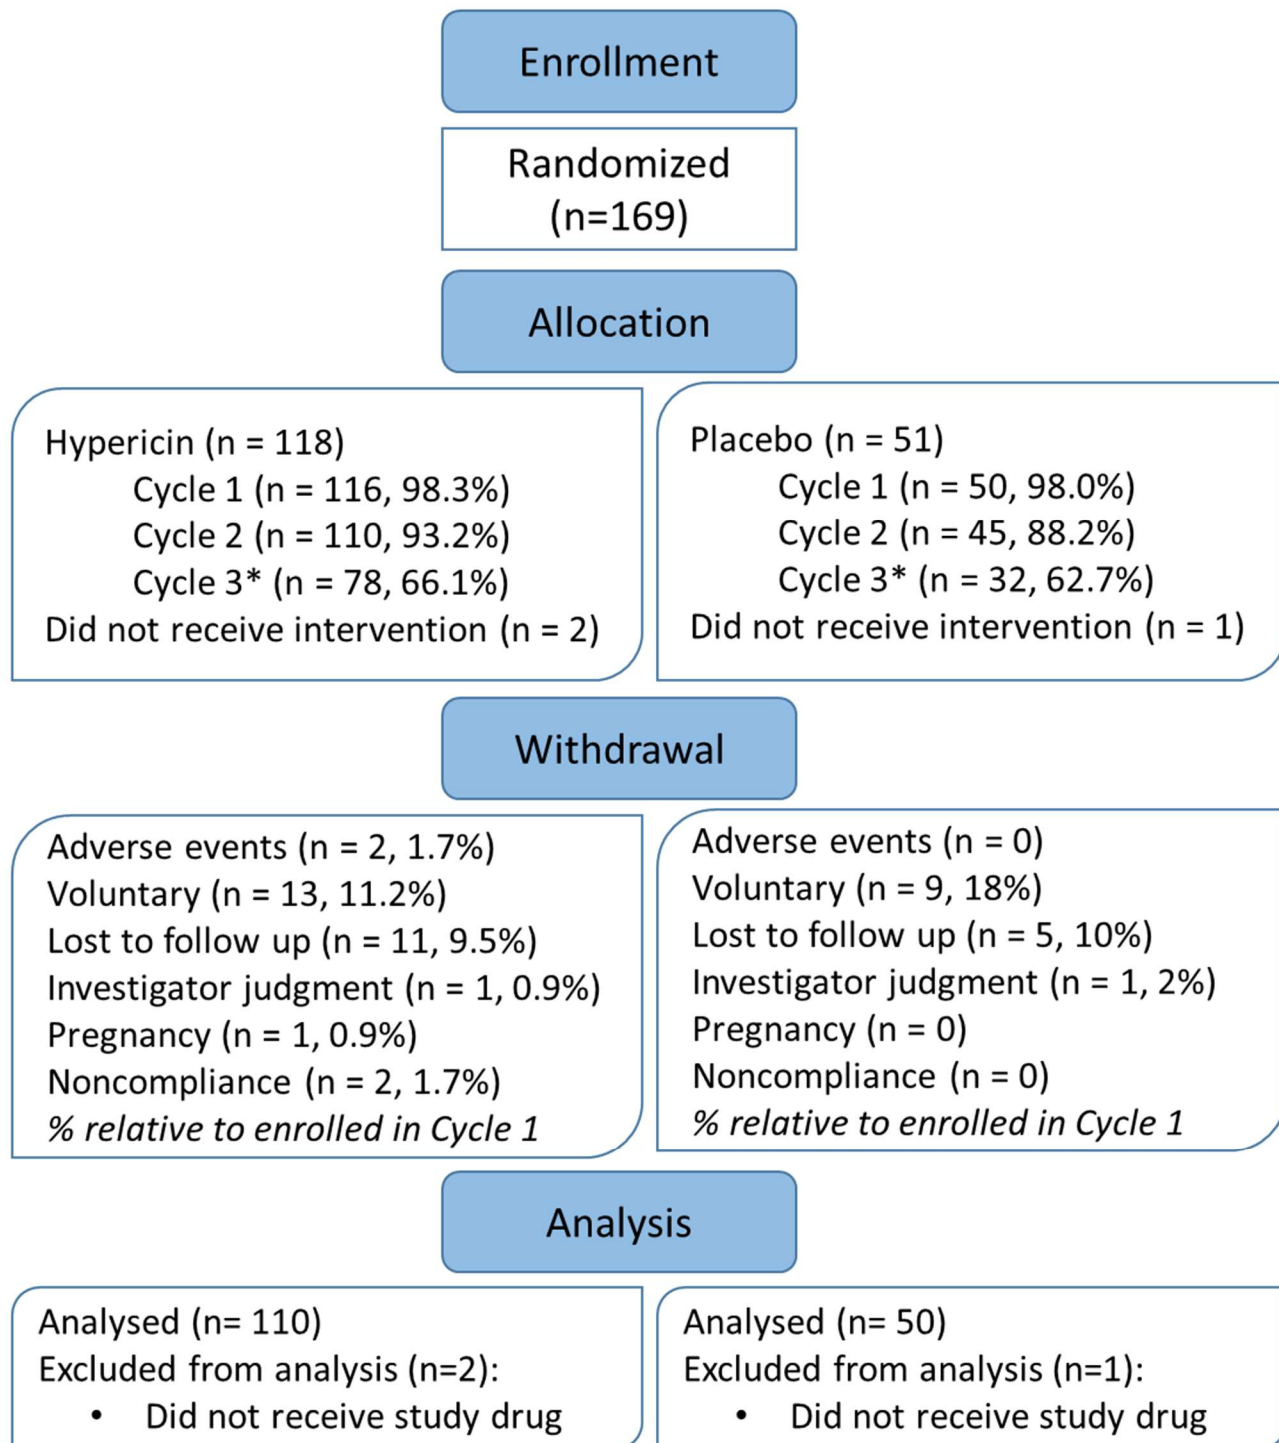

**eFigure 2) Light Penetration in Skin as a Function of Wavelength**

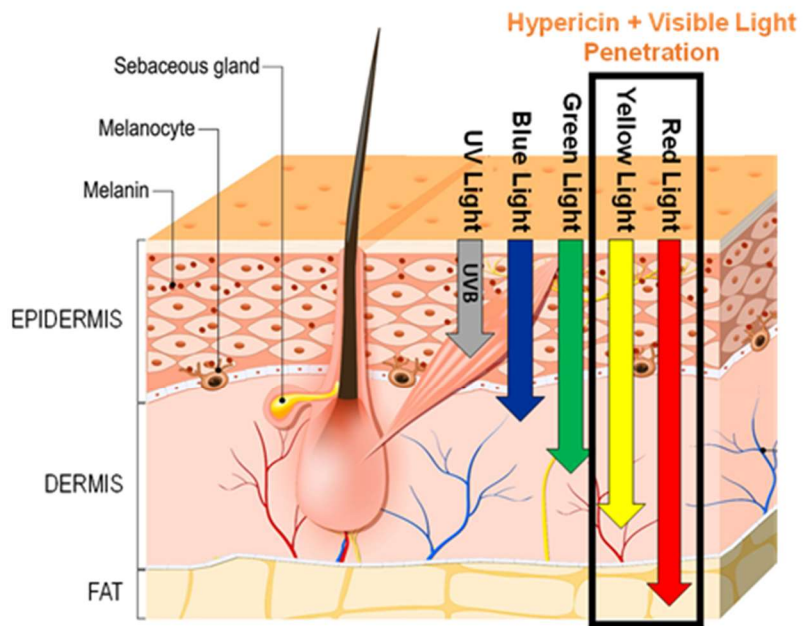

Supplement: jamadermatol-e222749-s002.pdf [file jamadermatol-e222749-s002.pdf]
