# Supplementary material
Source: PubMed Central journal article supplement (PMC9301595)
Supplement: jamadermatol-e222749-s003.pdf [file jamadermatol-e222749-s003.pdf]

## Data Sharing Statement

Kim. Efficacy and Safety of Topical Hypericin Photodynamic Therapy for Early-Stage Cutaneous T-Cell Lymphoma (Mycosis Fungoides). *JAMA Dermatol.* Published July 20, 2022. doi:10.1001/jamadermatol.2022.2749

### Data

**Data available:** No

### Additional Information

**Explanation for why data not available:** We are deferring data sharing until FDA has completed review of the clinical trial data.
